# Supplementary material for: Landscape Is the Main Driver of Weed Assemblages in Field Margins but Is Outperformed by Crop Competition in Field Cores
Source: MDPI journal article supplement (doi:10.3390/plants10102131), 2021-10-07
Supplement: s1 [file s1]

**Table S1.** Statistics of the models for weed (A) species richness and (B) abundance in field cores. Herbicide intensity is expressed with the quantity of active substance (QA). Abundance was log-transformed, and management practice variables were centered and reduced. The estimated buffer radii are indicated for each landscape variable. Landscape variables have two degrees of freedom because both their spatial extent (i.e. estimation of buffer radius) and their effect were estimated. Significant effects are indicated in bold. R-squared were 22.4% and 16.0% for weed species richness and abundance.

|                           |                                      | Estimated buffer<br>radius (m) | Estimate | df | t-value | p-value          |
|---------------------------|--------------------------------------|--------------------------------|----------|----|---------|------------------|
| (A) Weed species richness | Intercept                            |                                | 17.394   | 1  | 14.018  | <b>&lt;0.001</b> |
|                           | Crop height                          |                                | -1.403   | 1  | -2.389  | <b>0.019</b>     |
|                           | Nitrogen                             |                                | 0.886    | 1  | 0.928   | 0.356            |
|                           | Herbicides                           |                                | -1.193   | 1  | -1.225  | 0.223            |
|                           | Hedge density                        | 17                             | 38.128   | 2  | 1.114   | 0.268            |
|                           | Amount of meadows                    | 586                            | -2.332   | 2  | -0.212  | 0.833            |
|                           | Amount of organic farming            | 739                            | -10.045  | 2  | -1.423  | 0.158            |
|                           | Amount of oilseed rape               | 209                            | -4.164   | 2  | -0.806  | 0.422            |
|                           | Nitrogen × Herbicides                |                                | 1.328    | 1  | 2.433   | <b>0.017</b>     |
|                           | Nitrogen × Amount of meadows         |                                | -39.328  | 1  | -2.622  | <b>0.010</b>     |
|                           | Nitrogen × Amount of organic farming |                                | -0.432   | 1  | -0.056  | 0.956            |
|                           | Herbicides × Amount of meadows       |                                | -15.245  | 1  | -0.922  | 0.359            |
|                           | Herbicides × Amount of organic       |                                | 12.966   | 1  | 1.946   | 0.054            |
|                           |                                      |                                |          |    |         |                  |
| (B) Weed abundance        | Intercept                            |                                | 2.103    | 1  | 43.069  | <b>&lt;0.001</b> |
|                           | Crop Height                          |                                | -0.084   | 1  | -2.953  | <b>0.004</b>     |
|                           | Herbicides                           |                                | -0.066   | 1  | -2.175  | <b>0.032</b>     |
|                           | Hedge density                        | 68                             | 6.351    | 2  | 1.361   | 0.177            |
|                           | Amount of meadows                    | 1                              | -0.590   | 2  | -1.263  | 0.209            |
|                           | Amount of organic farming            | 28                             | 0.299    | 2  | 1.449   | 0.150            |
|                           | Amount of oilseed rape               | 25                             | 0.164    | 2  | 0.906   | 0.367            |
|                           | Herbicides × Amount of meadows       |                                | 0.239    | 1  | 0.373   | 0.710            |
|                           | Herbicides × Amount of organic       |                                | -0.011   | 1  | -0.062  | 0.950            |

**Table S2.** Statistics of the competing structural equation models with different types of link between field margin and field core floras. ‘Indirect link’ tests the effect of landscape variables on field core flora through the endogenous variable (either weed species richness or abundance in field margin), while ‘direct link’ tests the effects of landscape variables directly on the field core flore. ‘No link’ indicates that floras in field core and field margin were not related. Herbicide intensity is expressed with the Quantity of Active substances (QA). Endogenous variables of each model are written in italic. R-squared for each response or endogenous variable, and the BIC of the structural equation model are presented. FM: Field margin and FC: Field core.

| Competing mechanism | Response variables  | Model description                                                                                                                             | R <sup>2</sup> | BIC  |
|---------------------|---------------------|-----------------------------------------------------------------------------------------------------------------------------------------------|----------------|------|
| Indirect link       | Richness FC         | <i>RichnessFM</i> + Nitrogen + Crop Height + Herbicides (QA) + Nitrogen x Herbicides                                                          | 33             | 75.4 |
|                     | <i>Richness FM</i>  | Meadows + Organic + Hedges + Oilseed rape + Rainfall                                                                                          | 12             |      |
| Direct link         | Richness FC         | <i>RichnessFM</i> + Nitrogen + Crop Height + Herbicides (QA) + Nitrogen x Herbicides (QA) + OrganicFM + MeadowsFM + HedgesFM + Oilseed rapeFM | 34             | 90.4 |
|                     | <i>Richness FM</i>  | Meadows + Organic + Hedges + Oilseed rape + Rainfall                                                                                          | 12             |      |
| No link             | Richness FC         | Nitrogen + Crop Height + Herbicides (QA) + Nitrogen x Herbicides (QA)                                                                         | 17             | 97.9 |
|                     | Richness FM         | Meadows + Organic + Hedges + Oilseed rape + Rainfall                                                                                          | 12             |      |
| Indirect link       | Abundance FC        | <i>Abundance FM</i> + Crop Height + Herbicides (QA)                                                                                           | 32             | 67.3 |
|                     | <i>Abundance FM</i> | Meadows + Temperature + Organic + Hedges + Oilseed rape + Rainfall                                                                            | 21             |      |
| Direct link         | Abundance FC        | <i>Abundance FM</i> + Crop Height + Herbicides (QA) + OrganicFM + MeadowsFM + HedgesFM + Oilseed rapeFM                                       | 33             | 82.5 |
|                     | <i>Abundance FM</i> | Meadows + Temperature + Organic + Hedges + Oilseed rape + Rainfall                                                                            | 21             |      |
| No link             | Abundance FC        | Crop Height + Herbicides (QA)                                                                                                                 | 11             | 97.0 |
|                     | Abundance FM        | Meadows + Temperature + Organic + Hedges + Oilseed rape + Rainfall                                                                            | 21             |      |

**Table S3.** Statistics of the competing structural equation models with different types of link between field margin and field core floras. ‘Indirect link’ tests the effect of landscape variables on field core flora through the endogenous variable (either weed species richness or abundance in field margin), while ‘direct link’ tests the effects of landscape variables directly on the field core flore. ‘No link’ indicates that floras in field core and field margin were not related. Herbicide intensity is expressed with the Treatment Frequency Index (TFI). Endogenous variables of each model are written in italic. R-squared for each response or endogenous variable, and the BIC of the structural equation model are presented. FM: Field margin and FC: Field core.

| Competing mechanism | Response variables  | Model description                                                                                                                          | R <sup>2</sup> | BIC  |
|---------------------|---------------------|--------------------------------------------------------------------------------------------------------------------------------------------|----------------|------|
| Indirect link       | Richness FC         | <i>Richness</i> FM + Nitrogen + Crop Height + Herbicides (TFI) + Nitrogen x Herbicides                                                     | 30             | 76.5 |
|                     | <i>Richness</i> FM  | Meadows + Organic + Hedges + Oilseed rape + Rainfall                                                                                       | 12             |      |
| Direct link         | Richness FC         | <i>Richness</i> FM + Nitrogen + Crop Height + Herbicides (TFI) + Nitrogen x Herbicides + OrganicFM + MeadowsFM + HedgesFM + Oilseed rapeFM | 32             | 90.9 |
|                     | <i>Richness</i> FM  | Meadows + Organic + Hedges + Oilseed rape + Rainfall                                                                                       | 12             |      |
| No link             | Richness FC         | Nitrogen + Crop Height + Herbicides (TFI) + Nitrogen x Herbicides                                                                          | 15             | 95.9 |
|                     | Richness FM         | Meadows + Organic + Hedges + Oilseed rape + Rainfall                                                                                       | 12             |      |
| Indirect link       | Abundance FC        | <i>Abundance</i> FM + Crop Height + Herbicides (TFI)                                                                                       | 30             | 68.1 |
|                     | <i>Abundance</i> FM | Meadows + Temperature + Organic + Hedges + Oilseed rape + Rainfall                                                                         | 21             |      |
| Direct link         | Abundance FC        | <i>Abundance</i> FM + Crop Height + Herbicides (TFI) + OrganicFM + MeadowsFM + HedgesFM + Oilseed rapeFM                                   | 31             | 82.3 |
|                     | <i>Abundance</i> FM | Meadows + Temperature + Organic + Hedges + Oilseed rape + Rainfall                                                                         | 21             |      |
| No link             | Abundance FC        | Crop Height + Herbicides (TFI)                                                                                                             | 9              | 96.4 |
|                     | Abundance FM        | Meadows + Temperature + Organic + Hedges + Oilseed rape + Rainfall                                                                         | 21             |      |

**Table S4.** a) Descriptive statistics for local and environmental variables. b) List of the herbicide molecules applied the studied fields.

a)

|                                                  | Mean ( $\pm$ SD)      | Min.   | Max.   |
|--------------------------------------------------|-----------------------|--------|--------|
| Crop height in field core (cm)                   | 145.9 ( $\pm$ 23.7)   | 80.0   | 190.0  |
| Crop height in field margin (cm)                 | 55.8 ( $\pm$ 47.8)    | 0.0    | 170.0  |
| Nitrogen input (kg.ha <sup>-1</sup> )            | 167.7 ( $\pm$ 55.4)   | 35.1   | 323.9  |
| Herbicide active quantity (g. ha <sup>-1</sup> ) | 1670.0 ( $\pm$ 910.0) | 0.0    | 4123.0 |
| Treatment Frequency Index                        | 1.9 ( $\pm$ 1.1)      | 0.0    | 5.8    |
| Mean tillage depth (cm)                          | 7.4 ( $\pm$ 2.7)      | 0.0    | 17.5   |
| Sampling date (Julian day)                       | 104.7 ( $\pm$ 6.3)    | 84.0   | 114.0  |
| Sum of mean growing day temperature (°C)         | 508.4 ( $\pm$ 128.9)  | 302.0  | 689.3  |
| Mean of growing day rainfall quantity (mm)       | 2285.0 ( $\pm$ 239.0) | 1702.0 | 2783.0 |
| Field area (ha)                                  | 6.6 ( $\pm$ 4. 7)     | 0.8    | 23.1   |

**b) List of the herbicide molecules applied in the studied fields**

$\alpha$ -chloroacetamides  
 acetamides  
 aryloxyphenoxy-propionates (fops)  
 benzamides  
 cyclohexanediones (dims)  
 diphenyl ether  
 glycine  
 imidazolinones  
 isoxazolidinone  
 phenoxy-carboxylates  
 phenyl ethers  
 phenylpyrazoline  
 pyridine-carboxylates  
 quinoline-carboxylates  
 sulfonylureas  
 triazolopyrimidine - type 1  
 triketones

**Table S5.** List of the taxa identified in the 115 oilseed rape fields of the study, according to the nomenclature used in Flora Gallica (Tison, Jean Marc & de Foucault, Bruno, 2014. Flora Gallica. Flore de France. Biotope, Mèze, 1196p). “Family sp” is used to refer to plants that could not be identified at the species level. We indicate the frequency of occurrence of the species in the whole data (%), and in fields (%).

| Species name                                                  | Frequency of occurrence (%) |        | Species name                                                | Occurrence (%) |        |
|---------------------------------------------------------------|-----------------------------|--------|-------------------------------------------------------------|----------------|--------|
|                                                               | Observations                | Fields |                                                             | Observations   | Fields |
| <i>Achillea millefolium</i> L.                                | 0.01                        | 1.74   | <i>Carduus</i> (L.) sp                                      | 0.20           | 18.26  |
| <i>Adonis annua</i> L.                                        | 0.05                        | 2.61   | <i>Centaurea jacea</i> L.                                   | 0.02           | 2.61   |
| <i>Aethusa cynapium</i> L.                                    | 0.09                        | 7.83   | <i>Cerastium glomeratum</i> Thuill.                         | 0.18           | 13.91  |
| <i>Alliaria petiolata</i> (M. Bieb.) Cavara & Grande          | 0.06                        | 3.48   | <i>Chenopodium hybridum</i> (L.) S.Fuentes, Uotila & Borsch | 0.02           | 1.74   |
| <i>Allium oleraceum</i> L.                                    | 0.16                        | 8.70   | <i>Chenopodium album</i> L.                                 | 0.89           | 33.91  |
| <i>Alopecurus myosuroides</i> Huds. subsp. <i>myosuroides</i> | 4.24                        | 66.96  | <i>Cirsium arvense</i> (L.) Scop.                           | 1.21           | 56.52  |
| <i>Althaea hirsute</i> L.                                     | 0.01                        | 0.87   | <i>Cirsium vulgare</i> (Savi) Ten.                          | 0.18           | 9.57   |
| <i>Ammi majus</i> L.                                          | 0.67                        | 20.00  | <i>Clematis vitalba</i> L.                                  | 0.02           | 0.87   |
| <i>Anisantha sterilis</i> (L.) Nevski                         | 0.81                        | 39.13  | <i>Convolvulus arvensis</i> L.                              | 4.30           | 83.48  |
| <i>Anthemis arvensis</i> L.                                   | 0.00                        | 0.87   | <i>Crepis sancta</i> (L.) Bornm.                            | 0.20           | 18.26  |
| <i>Anthemis cotula</i> L.                                     | 0.27                        | 1.74   | <i>Cyanus segetum</i> Hill                                  | 0.05           | 2.61   |
| <i>Anthriscus caucalis</i> M.Bieb.                            | 0.08                        | 6.96   | <i>Dactylis glomerata</i> L.                                | 0.02           | 3.48   |
| <i>Anthriscus sylvestris</i> (L.) Hoffm.                      | 0.02                        | 1.74   | <i>Daucus carota</i> L.                                     | 0.87           | 45.22  |
| <i>Aphanes arvensis</i> L.                                    | 1.45                        | 31.30  | <i>Draba muralis</i> L.                                     | 0.04           | 3.48   |
| <i>Apiaceae</i> (Lindl.) sp.                                  | 0.00                        | 0.87   | <i>Echinochloa crus-galli</i> (L.) P.Beauv.                 | 0.02           | 1.74   |
| <i>Arabidopsis thaliana</i> (L.) Heynh.                       | 0.01                        | 0.87   | <i>Elytrigia repens</i> (L.) Desv. ex Nevski                | 0.47           | 21.74  |
| <i>Arctium lappa</i> L.                                       | 0.05                        | 3.48   | <i>Epilobium tetragonum</i> L.                              | 0.10           | 8.70   |
| <i>Arenaria serpyllifolia</i> L.                              | 0.12                        | 9.57   | <i>Erigeron</i> L. sp                                       | 0.00           | 0.87   |
| <i>Arrhenatherum elatius</i> (L.) J. Presl & C. Presl         | 0.02                        | 3.48   | <i>Erodium cicutarium</i> (L.) L.Hér.                       | 0.62           | 10.43  |
| <i>Arum italicum</i> Mill.                                    | 0.04                        | 5.22   | <i>Erodium moschatum</i> (L.) L.Hér.                        | 0.01           | 1.74   |
| <i>Asteraceae</i> (Martinov) sp.                              | 0.02                        | 2.61   | <i>Euphorbia helioscopia</i> L.                             | 1.13           | 43.48  |
| <i>Atriplex patula</i> L.                                     | 1.25                        | 41.74  | <i>Euphorbia peplus</i> L.                                  | 0.01           | 1.74   |
| <i>Avena fatua</i> L.                                         | 1.73                        | 49.57  | <i>Falcaria vulgaris</i> Bernh.                             | 0.24           | 23.48  |
| <i>Barbarea intermedia</i> Boreau                             | 0.01                        | 1.74   | <i>Fallopia convolvulus</i> (L.) Á.Löwe                     | 5.98           | 78.26  |
| <i>Borago officinalis</i> L.                                  | 0.01                        | 0.87   | <i>Festuca rubra</i> L.                                     | 0.17           | 8.70   |
| <i>Brassicaceae</i> (Burnett.) sp                             | 0.01                        | 1.74   | <i>Ficaria verna</i> Huds.                                  | 0.03           | 3.48   |
| <i>Bromus hordeaceus</i> L.                                   | 0.72                        | 32.17  | <i>Fumaria officinalis</i> L.                               | 0.19           | 16.52  |
| <i>Bryonia dioica</i> Jacq.                                   | 0.01                        | 0.87   | <i>Galium aparine</i> L.                                    | 4.37           | 84.35  |
| <i>Buglossoides arvensis</i> (L.) I.M.Johnst.                 | 0.01                        | 1.74   | <i>Galium mollugo</i> L.                                    | 0.07           | 10.43  |
| <i>Calepina irregularis</i> (Asso) Thell.                     | 0.60                        | 18.26  | <i>Geranium columbinum</i> L.                               | 0.16           | 13.91  |
| <i>Capsella bursa pastoris</i> (L.) Medik.                    | 0.94                        | 37.39  | <i>Geranium dissectum</i> L.                                | 4.02           | 79.13  |
| <i>Cardamine hirsute</i> L.                                   | 0.03                        | 3.48   | <i>Geranium molle</i> L.                                    | 1.67           | 51.30  |

|                                                           |      |       |                                                   |      |       |
|-----------------------------------------------------------|------|-------|---------------------------------------------------|------|-------|
| <i>Geranium pusillum</i> L.                               | 0.05 | 4.35  | <i>Plantago lanceolata</i> L.                     | 0.10 | 13.04 |
| <i>Geranium robertianum</i> L.                            | 0.31 | 15.65 | <i>Poa annua</i> L.                               | 0.46 | 15.65 |
| <i>Geranium rotundifolium</i> L.                          | 0.62 | 24.35 | <i>Poa pratensis</i> L.                           | 0.03 | 3.48  |
| <i>Glechoma hederacea</i> L.                              | 0.00 | 0.87  | <i>Poa trivialis</i> L.                           | 0.35 | 20.87 |
| <i>Hedera helix</i> L.                                    | 0.01 | 1.74  | <i>Polygonum aviculare</i> L.                     | 4.23 | 68.70 |
| <i>Helianthus annuus</i> L.                               | 0.00 | 0.87  | <i>Potentilla reptans</i> L.                      | 0.07 | 6.96  |
| <i>Heliotropium europaeum</i> L.                          | 0.01 | 1.74  | <i>Prunella vulgaris</i> L.                       | 0.01 | 1.74  |
| <i>Helminthotheca echinoides</i> (L.) Holub               | 0.82 | 53.91 | <i>Ranunculus parviflorus</i> L.                  | 0.07 | 6.96  |
| <i>Hypericum perforatum</i> L.                            | 0.03 | 1.74  | <i>Raphanus raphanistrum</i> L.                   | 0.16 | 3.48  |
| <i>Hypochaeris radicata</i> L.                            | 0.00 | 0.87  | <i>Reseda lutea</i> L.                            | 1.33 | 38.26 |
| <i>Jacobaea vulgaris</i> (Gaertn.) subsp. <i>vulgaris</i> | 0.01 | 1.74  | <i>Rubus fruticosus</i> L.                        | 0.27 | 24.35 |
| <i>Kickxia spuria</i> (L.) Dumort.                        | 0.44 | 15.65 | <i>Rumex crispus</i> L.                           | 0.16 | 13.04 |
| <i>Knautia arvensis</i> (L.) Coult.                       | 0.00 | 0.87  | <i>Rumex obtusifolius</i> L.                      | 0.02 | 0.87  |
| <i>Lactuca serriola</i> L.                                | 0.15 | 24.35 | <i>Saxifraga tridactylites</i> L.                 | 0.00 | 0.87  |
| <i>Lactuca virosa</i> L.                                  | 0.02 | 1.74  | <i>Scandix pecten veneris</i> L.                  | 0.22 | 11.30 |
| <i>Lamium amplexicaule</i> L.                             | 0.23 | 10.43 | <i>Schedonorus arundinaceus</i> (Schreb.) Dumort. | 0.08 | 2.61  |
| <i>Lamium purpureum</i> L.                                | 0.94 | 49.57 | <i>Schedonorus pratensis</i> (Huds.) P.Beauv.     | 0.04 | 1.74  |
| <i>Lapsana communis</i> L.                                | 0.23 | 15.65 | <i>Senecio vulgaris</i> L.                        | 0.66 | 39.13 |
| <i>Lathyrus aphaca</i> L.                                 | 0.03 | 3.48  | <i>Sherardia arvensis</i> L.                      | 0.68 | 40.00 |
| <i>Legousia speculum-veneris</i> (L.) Chaix               | 0.20 | 7.83  | <i>Silene latifolia</i> Poir. subsp. <i>alba</i>  | 0.96 | 45.22 |
| <i>Linaria vulgaris</i> Mill.                             | 0.01 | 1.74  | <i>Silene vulgaris</i> (Moench) Garcke            | 0.03 | 4.35  |
| <i>Lolium multiflorum</i> Lam.                            | 1.89 | 40.87 | <i>Silybum marianum</i> (L.) Gaertn.              | 0.23 | 15.65 |
| <i>Lysimachia arvensis</i> (L.) U.Manns & Anderb.         | 3.89 | 44.35 | <i>Sinapis alba</i> L.                            | 0.27 | 6.09  |
| <i>Malva sylvestris</i> L.                                | 0.65 | 27.83 | <i>Sinapis arvensis</i> L.                        | 2.19 | 50.43 |
| <i>Matricaria chamomilla</i> (L.) Bernh.                  | 0.06 | 4.35  | <i>Sison segetum</i> L.                           | 0.15 | 13.04 |
| <i>Medicago arabica</i> (L.) Huds.                        | 0.04 | 1.74  | <i>Sisymbrium officinale</i> (L.) Scop.           | 0.36 | 6.96  |
| <i>Medicago lupulina</i> L.                               | 0.04 | 6.09  | <i>Solanum nigrum</i> L.                          | 0.46 | 17.39 |
| <i>Medicago minima</i> (L.) L.                            | 0.00 | 0.87  | <i>Sonchus asper</i> (L.) Hill                    | 2.29 | 55.65 |
| <i>Medicago polymorpha</i> L.                             | 0.04 | 2.61  | <i>Sonchus oleraceus</i> L.                       | 1.10 | 50.43 |
| <i>Medicago sativa</i> L.                                 | 0.24 | 4.35  | <i>Stachys arvensis</i> (L.) L.                   | 0.03 | 5.22  |
| <i>Mentha suaveolens</i> Ehrh.                            | 0.01 | 0.87  | <i>Stellaria media</i> (L.) Vill.                 | 1.30 | 26.09 |
| <i>Mercurialis annua</i> L.                               | 7.40 | 80.00 | <i>Symphytum officinale</i> L.                    | 0.00 | 0.87  |
| <i>Muscari comosum</i> (L.) Mill.                         | 0.05 | 6.96  | <i>Taraxacum</i> F.H. Wigg. sp.                   | 0.14 | 14.78 |
| <i>Myosotis arvensis</i> (L.) Hill                        | 0.81 | 34.78 | <i>Thlaspi arvense</i> L.                         | 0.05 | 5.22  |
| <i>Ononis spinosa</i> L.                                  | 0.02 | 1.74  | <i>Tordylium maximum</i> L.                       | 0.03 | 4.35  |
| <i>Ornithogalum umbellatum</i> L.                         | 0.01 | 0.87  | <i>Torilis arvensis</i> (Huds.) Link              | 0.84 | 37.39 |
| <i>Papaver rhoeas</i> L.                                  | 1.68 | 65.22 | <i>Torilis nodosa</i> (L.) Gaertn.                | 0.00 | 0.87  |
| <i>Papaver somniferum</i> L. subsp. <i>somniferum</i>     | 0.04 | 0.87  | <i>Trifolium incarnatum</i> L.                    | 0.00 | 0.87  |
| <i>Persicaria maculosa</i> Gray                           | 0.28 | 5.22  | <i>Trifolium pratense</i> L.                      | 0.01 | 1.74  |
| <i>Phacelia tanacetifolia</i> Benth.                      | 0.02 | 1.74  | <i>Trifolium repens</i> L.                        | 0.02 | 2.61  |
| <i>Picris hieracioides</i> L.                             | 1.32 | 54.78 | <i>Tripleurospermum inodorum</i> (L.) Sch. Bip.   | 0.65 | 7.83  |

|                                          |      |       |                                    |      |       |
|------------------------------------------|------|-------|------------------------------------|------|-------|
| <i>Triticum</i> L. <i>sp</i>             | 2.92 | 65.22 | <i>Vicia faba</i> L.               | 0.10 | 1.74  |
| <i>Valerianella locusta</i> (L.) Laterr. | 0.24 | 24.35 | <i>Vicia sativa</i> L.             | 0.26 | 8.70  |
| <i>Veronica arvensis</i> L.              | 0.61 | 26.96 | <i>Vinca minor</i> L.              | 0.02 | 1.74  |
| <i>Veronica hederifolia</i> L.           | 2.74 | 63.48 | <i>Viola arvensis</i> Murray       | 5.79 | 79.13 |
| <i>Veronica persica</i> Poir.            | 3.35 | 73.91 | <i>Vulpia bromoides</i> (L.) Gray  | 0.06 | 2.61  |
| <i>Veronica polita</i> Fr.               | 0.05 | 2.61  | <i>Vulpia myuros</i> (L.) C.C.Gmel | 0.01 | 0.87  |

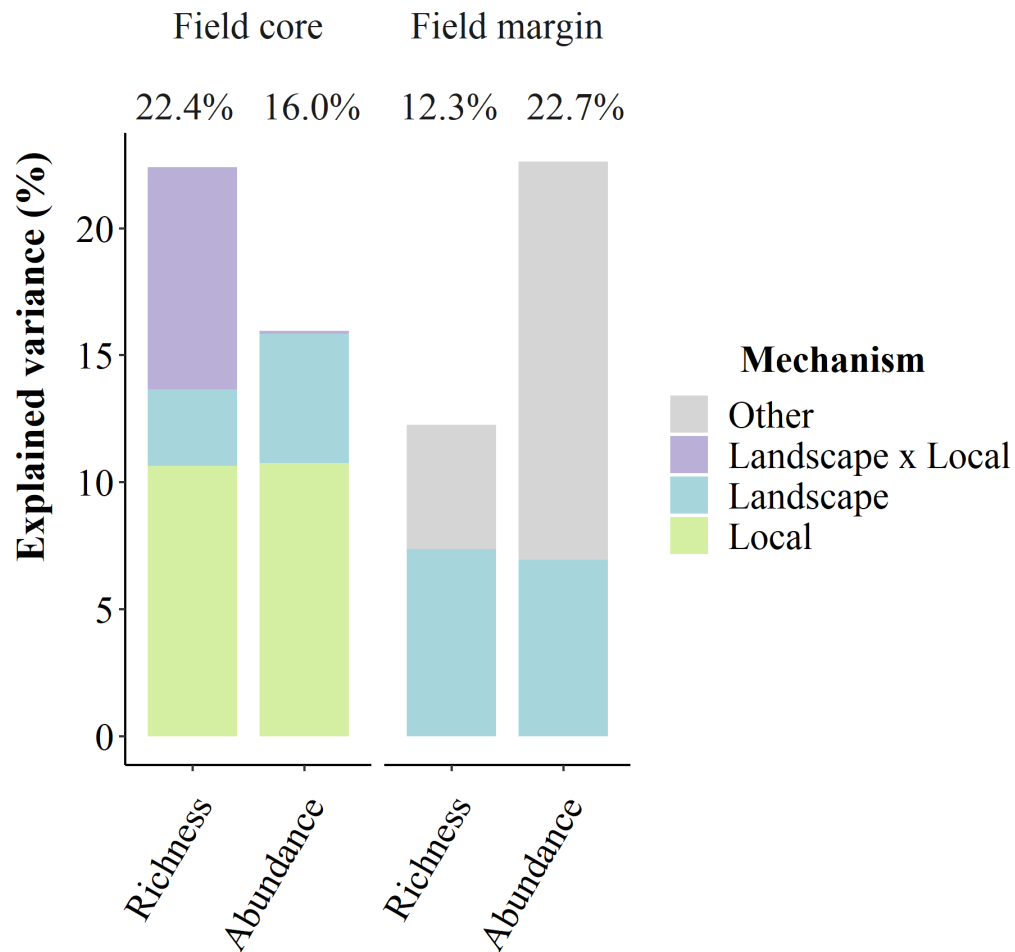

**Figure S1:** Percentage of explained variance by local factors (crop height, the amount of nitrogen, the intensity of herbicides use and number of mechanical operations), landscape (amount of organic farming, meadows, oilseed rape and hedge density) and weather conditions (rainfall and temperature) on weed species richness and abundance in field cores and field margins. The intensity of herbicide use is expressed using the quantity of active substances. The buffer radii at which the amount of each landscape variable was estimated are shown in Table 1 for field cores and Table 2 3 for field margins. R-squared computed from the type III Anovas of respective models are indicated above each corresponding barplot.



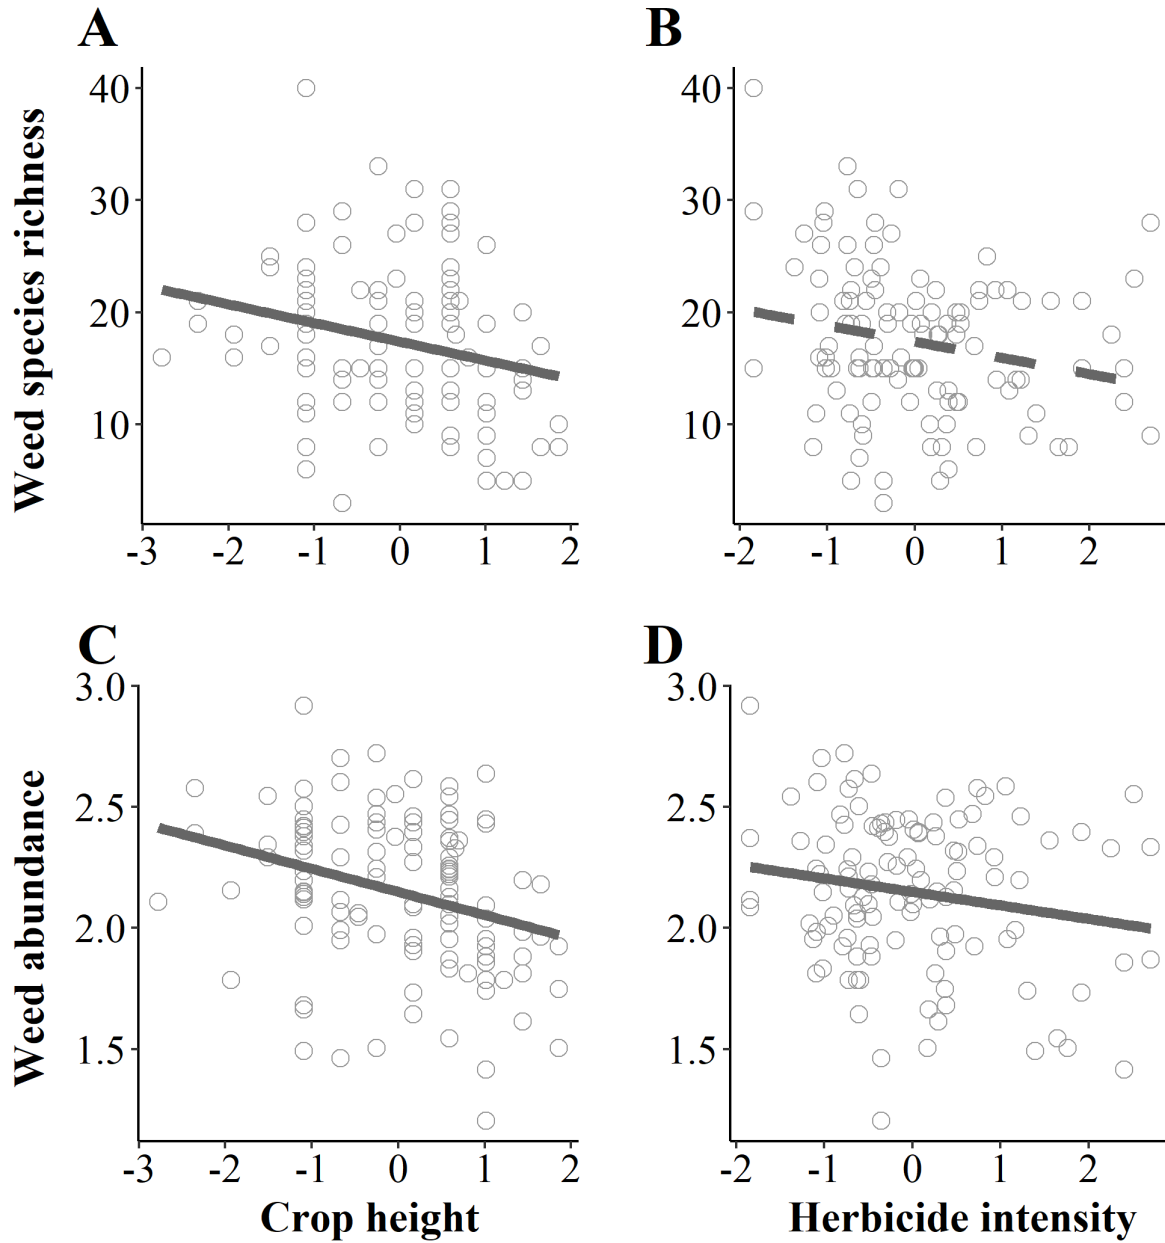

**Figure S2:** Relationship between weed species richness (A,B) and abundance (C,D) in field cores with crop height (A,C) and the intensity of herbicide applications (B,D). Abundance was log-transformed and explanatory variables were scaled. The intensity of herbicide use is expressed using the Quantity of Active substances (QA). Dashed lines indicate non-significant relationships.

**A**

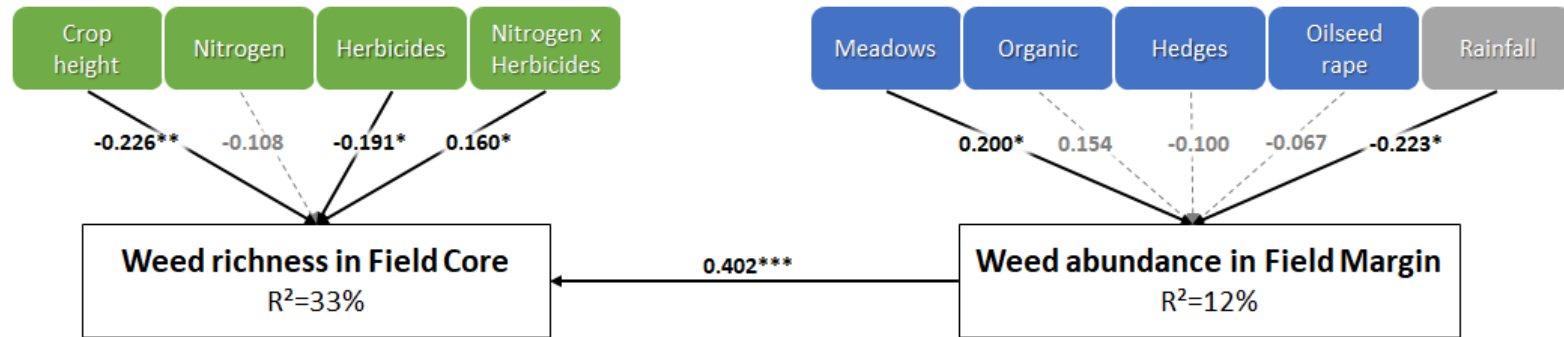

**B**

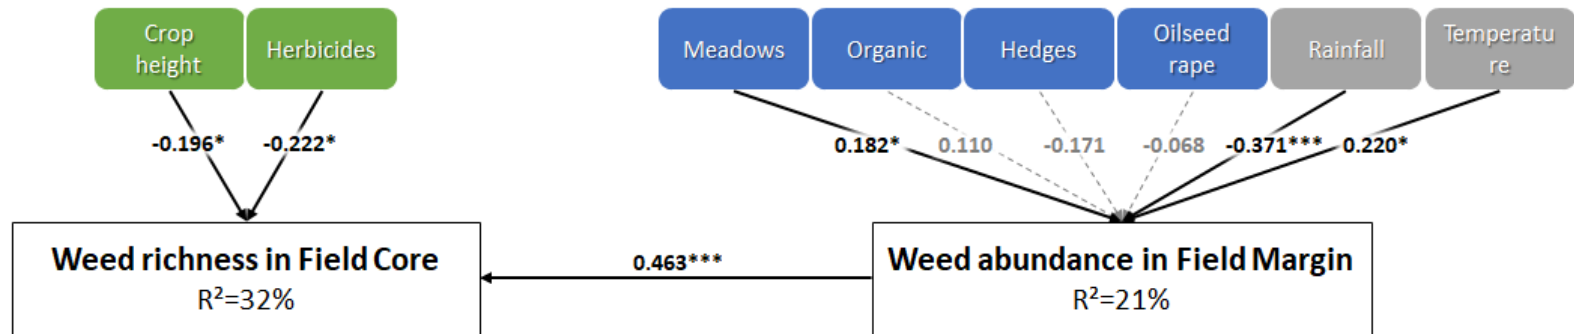

**Figure S3.** Structural Equation Models for weed species richness (A) and abundance (B) where the link between field margin and field core was specified. Arrows represent the directionality of the effect, and the coefficients indicate the standardized estimates. Dashed lines represent non-significant effects. \*: p-value < 0.05; \*\*: p-value < 0.01; \*\*\*: p-value < 0.001. The intensity of herbicide use is expressed using the Quantity of Active substances. The buffer radius at which the amount of each landscape variable was estimated is shown in Table 2 for field margin.
